# Supplementary material for: π-System based coordination polymer hollow nanospheres for the selective sensing of aromatic nitro explosive compounds
Source: Royal Society of Chemistry journal article supplement (doi:10.1039/c5nj01476j), 2015-01-01
Supplement: c5nj01476j1.pdf [file c5nj01476j1.pdf]

## Supporting Information

### $\pi$ -System Based Coordination Polymer Hollow Nanospheres for Selective Sensing of Aromatic Nitro Explosive Compounds

Naien Shi,<sup>\*a</sup> Yang Zhang,<sup>a</sup> Dandan Xu,<sup>a</sup> Chuanyuan Song,<sup>a</sup> Xiaolei Jin,<sup>a</sup> Dong Liu,<sup>a</sup>  
Linghai Xie<sup>a</sup> and Wei Huang<sup>\*a,b</sup>

*a. Key Laboratory for Organic Electronics & Information Displays (KLOEID) and  
Institute of Advanced Materials (IAM), Nanjing University of Posts &  
Telecommunications, Nanjing 210023, Jiangsu, China. E-mail:  
iamneshi@njupt.edu.cn; Fax: +86 25 8586 6332. Tel: +86 25 8586 6396.*

*b. Jiangsu-Singapore Joint Research Center for Organic/Bio-Electronics &  
Information Displays and Institute of Advanced Materials (IAM), Nanjing Tech  
University, Nanjing 211816, Jiangsu, China. E-mail: wei-huang@njtech.edu.cn;  
Fax: +86 25 5813 9988; Tel: +86 25 5813 9001*

### Contents

|                                                                       |               |
|-----------------------------------------------------------------------|---------------|
| <i>S1. Molecular stacks (Fig. S1).....</i>                            | <i>Page 2</i> |
| <i>S2. Synthesis, composition and microstructure (Fig. S2-6).....</i> | <i>Page 2</i> |
| <i>S3. Fluorescence sensing tests (Fig. S7-11, Table S1).....</i>     | <i>Page 5</i> |
| <i>S4. Formation of the structures (Fig. S12-20).....</i>             | <i>Page 8</i> |

## Figures and Captions.

### S1. Molecular stacks (TbBTB)

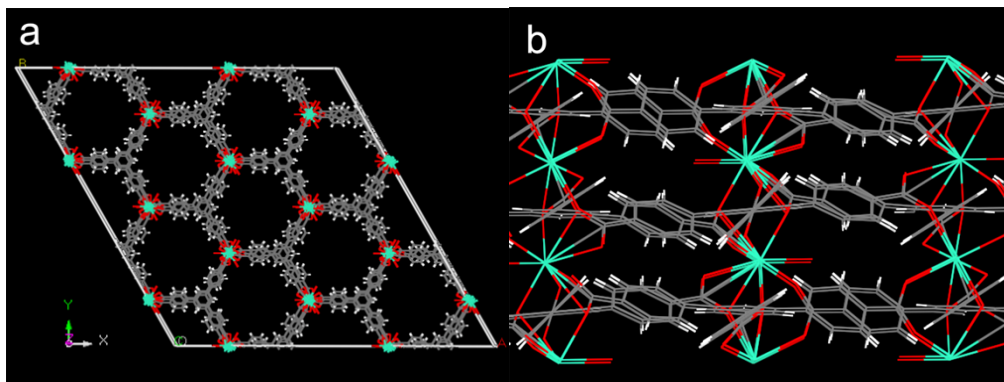

**Fig. S1** (a) Direct view of MIL-103 along z axis. Space group: R32 (CCDC-28584).

Cell parameters:  $a=28.5344(8)$ ,  $c=12.2148(5)$ ,  $V=8613.0(5)$   $\text{Å}^3$ . (b) The enlarged view along y axis. Tb is coordinated with one water oxygen atom and eight carboxylate oxygen atoms of 6 separate BTB ligands.<sup>[1]</sup>

### S2. Synthesis, composition and microstructure

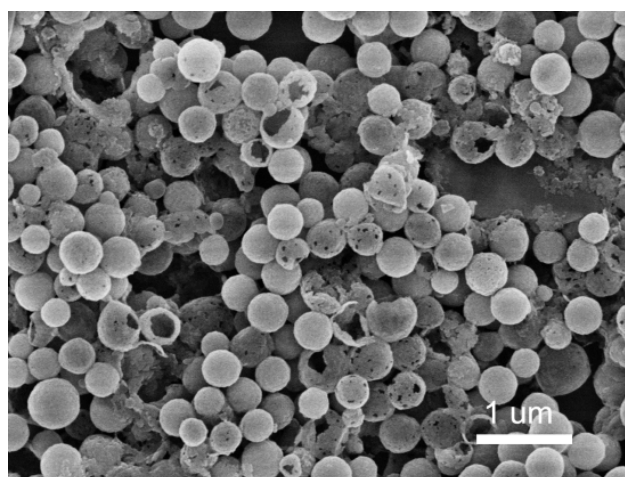

**Fig. S2** Low magnification FESEM image of the obtained TbBTB hollow spheres.

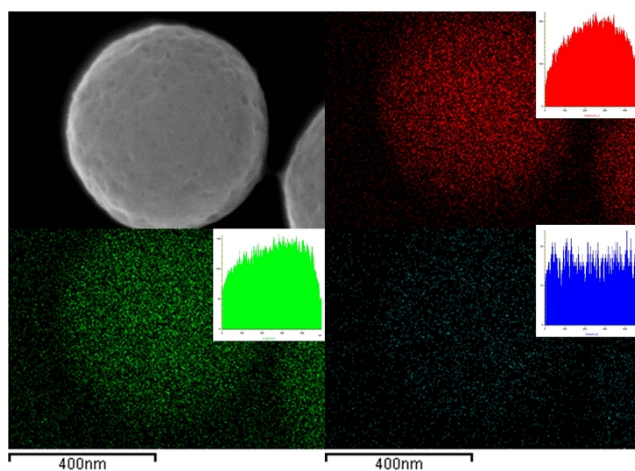

**Fig. S3** EDX Mapping results of a single sphere. Red, green and blue represent C , O, Tb, respectively.

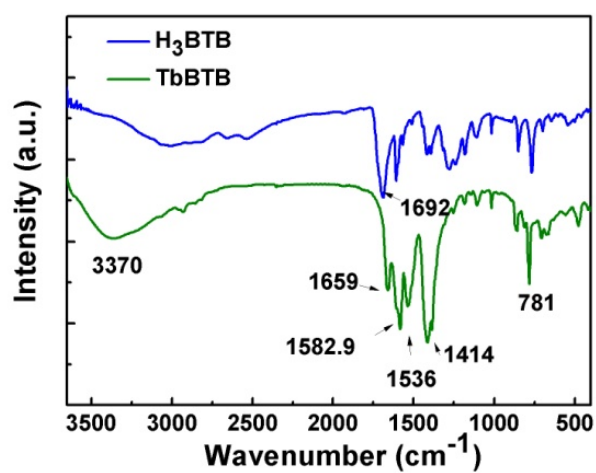

**Fig. S4** FT-IR spectra of H<sub>3</sub>BTB and TbBTB nanospheres.

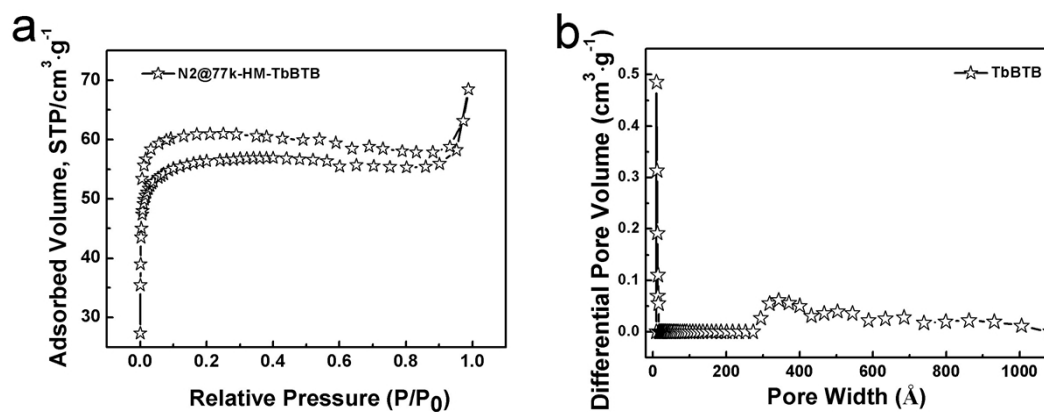

**Fig. S5** (a) N<sub>2</sub> adsorption/desorption isotherm (b) Pore width distribution of the nanospheres.

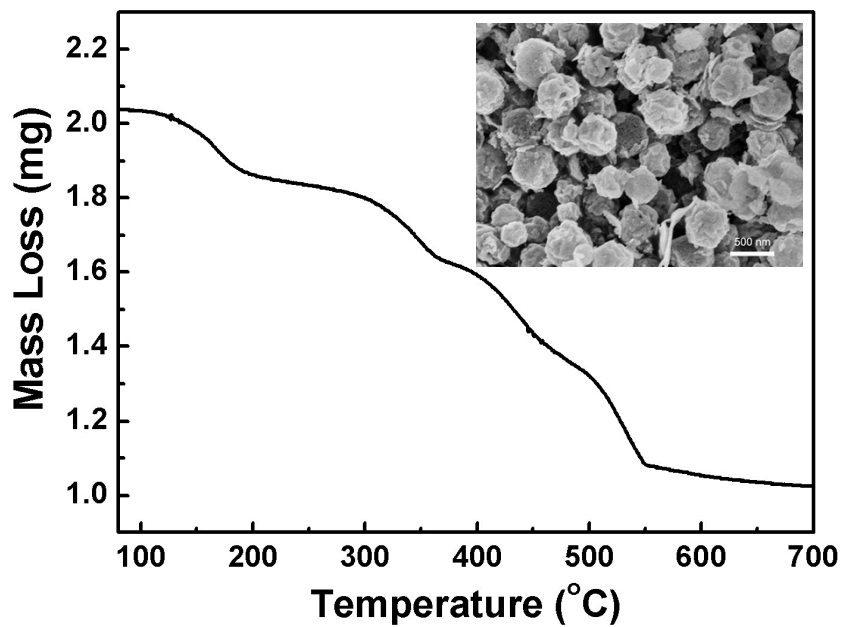

**Fig. S6** Thermogravimetric (TG) curve of TbBTB nanospheres. The inset is corresponding FESEM image of the product obtained after thermal analysis.

### S3. Fluorescence sensing tests

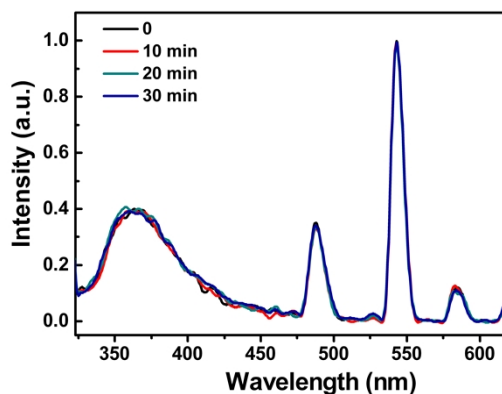

**Fig. S7** Time-dependent fluorescence spectra of the DMF dispersion of TbBTB nanospheres dispersed in DMF.

**Table S1.** Reported sensing performance of lanthanide based MOF for 2,4-DNT.

| Sensing materials                                                                                                                      | Sensitivity<br>(Quenching efficiency;<br>Ksv&Concentration Scale)                | Literatures                                                                                                               |
|----------------------------------------------------------------------------------------------------------------------------------------|----------------------------------------------------------------------------------|---------------------------------------------------------------------------------------------------------------------------|
| Eu <sub>2</sub> (BDC) <sub>3</sub> (H <sub>2</sub> O) <sub>2</sub> ·(H <sub>2</sub> O) <sub>2</sub><br>(BDC=benzene-1,4-dicarboxylate) | 2,4-DNT:<br>0.83 mM (150ppm), 56%<br>Ksv: no value                               | H. Xu, F. Liu, Y. Cui, B. Chen and G. Qian, <i>Chem. Commun.</i> , 2011, <b>47</b> , 3153-3155                            |
| [Tb(TTCA)(DMA)(H <sub>2</sub> O)]·7 DMA·9.5H <sub>2</sub> O<br>(TTCA=triphenylene-2,6,10-tricarboxylate; DMA= N,N-dimethyl acetamide)  | 2,4-DNT:<br>4mM, 82%<br>1mM, 59%<br>Ksv: no value                                | Y.-N. Gong, L. Jiang and T.-B. Lu, <i>Chem. Commun.</i> , 2013, <b>49</b> , 11113-11115                                   |
| Eu-MFDA<br>Space group: <i>P2<sub>1</sub>/c</i><br>(H <sub>2</sub> MFDA = 9,9-dimethylfluorene-2,7-dicarboxylic acid)                  | 2,4-DNT: 1mM, 46 %<br>Ksv: 1.31*10 <sup>3</sup> M <sup>-1</sup> @0~50mM          | X. Zhou, H. Li, H. Xiao, L. Li, Q. Zhao, T. Yang, J. Zuo and W. Huang, <i>Dalton Trans.</i> , 2013, <b>42</b> , 5718-5723 |
| Eu-MFDA<br>Space group: <i>Pnna</i>                                                                                                    | 2,4-DNT: 1mM, 36.5%<br>Ksv: 1.58*10 <sup>3</sup> M <sup>-1</sup> @0~50mM         | X. Zhou, L. Li, H. Li, A. Li, T. Yang and W. Huang, <i>Dalton Trans.</i> , 2013, <b>42</b> , 12403-12409                  |
| [Y <sub>1.8</sub> Eu <sub>0.2</sub> (PDA) <sub>3</sub> (H <sub>2</sub> O) <sub>1</sub> ]·2H <sub>2</sub> O                             | 2,4-DNT: 20 μM, 50%<br>Ksv: nonlinear@>20μM<br>Ksv: 5.01×10 <sup>4</sup> @0~20μM | D. K. Singha, P. Majee, S. K. Mondal and P. Mahata, <i>Eur. J. Inorg. Chem.</i> , 2015,                                   |

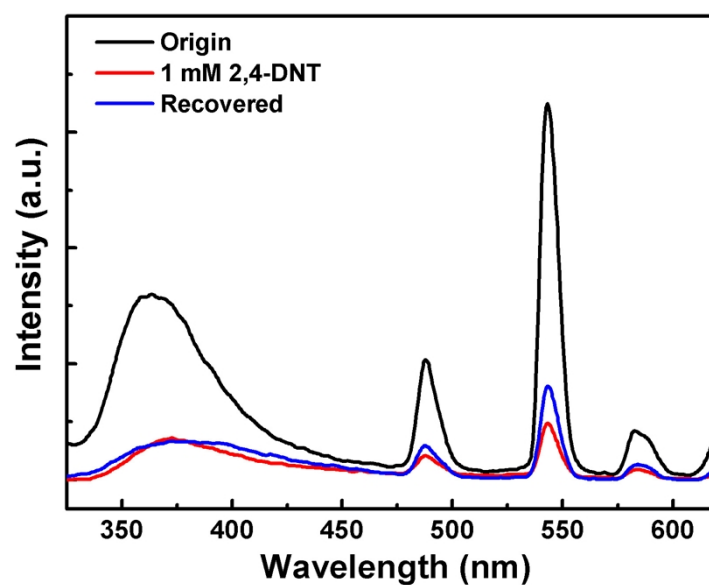

**Fig. S8** The fluorescence quenching and recovery test of TbBTB nanospheres. The black, red and blue curves represent the fluorescent spectra of the original TbBTB nanosphere dispersion, the dispersion in 1 mM DNT and the recovered dispersion after removing the DNT, respectively.

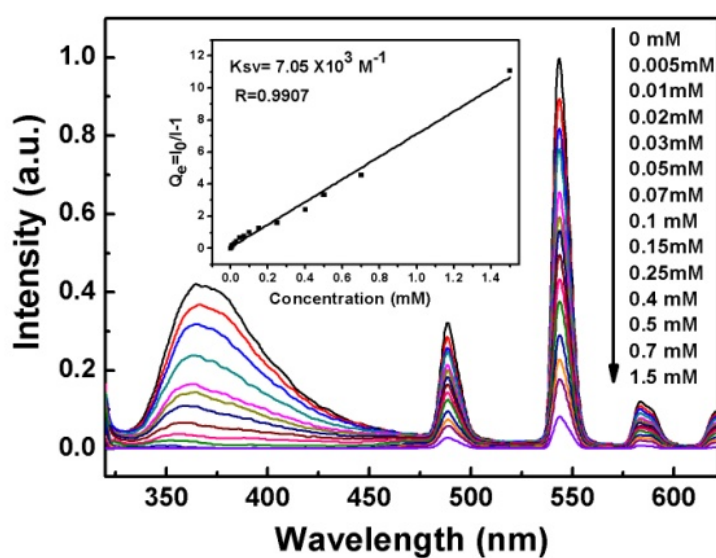

**Fig. S9** Concentration-dependent luminescence responses of TbBTB nanospheres for PA. The inset is the corresponding Stern-Volmer plot.

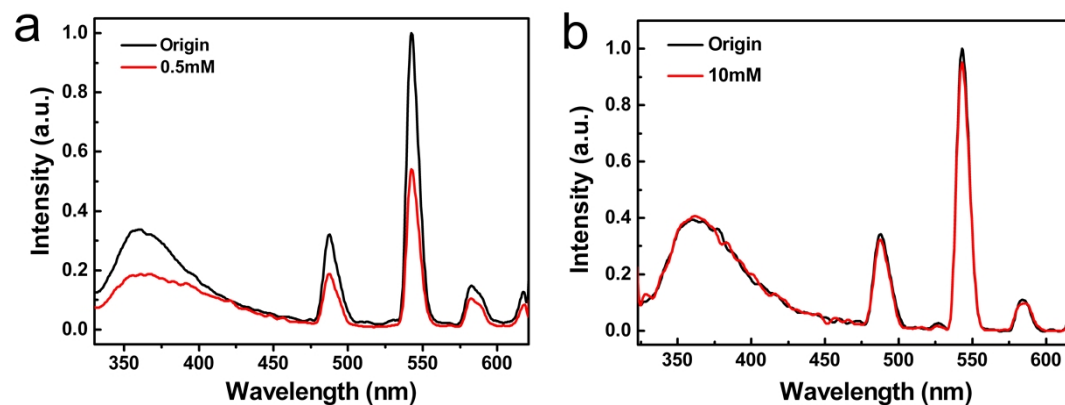

**Fig. S10** (a) Fluorescence spectra of the MeCN dispersion of TbBTB hollow spheres with (red line) /without (black line) 2,4,6-Trinitrotoluene (TNT) (TNT:  $5.0 \times 10^{-4}$  M; LUMO: -3.930 eV, HOMO: -8.810 eV)<sup>[2]</sup>,  $\lambda_{\text{ex}} = 314$  nm (b) Fluorescence spectra of the DMF dispersion of TbBTB hollow spheres with (red line) /without (black line) MeCN (MeCN: 10 mM).  $\lambda_{\text{ex}} = 314$  nm.

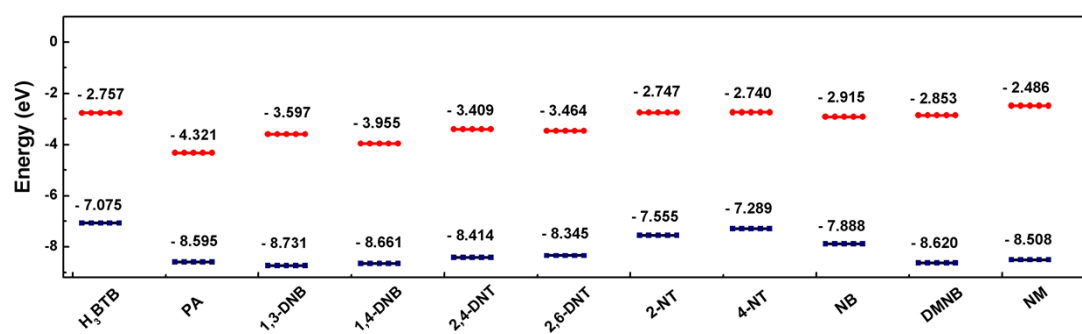

**Fig. S11** HOMO and LUMO energies of the analyte targets by calculation via Gaussian 09 at the B3LYP/6-31G\* level or by reference.<sup>[2]</sup>

#### S4. Formation of the structures

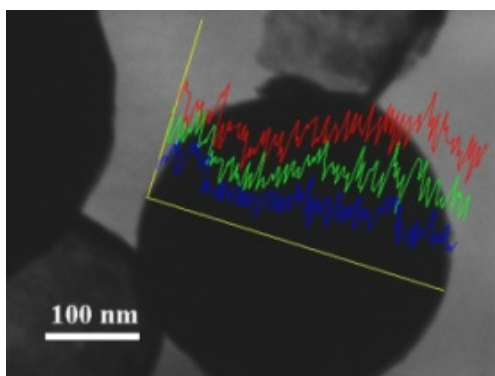

**Fig. S12** Stacking elements TEM image of a solid sphere. Red, green and blue represent C , O, Tb, respectively.

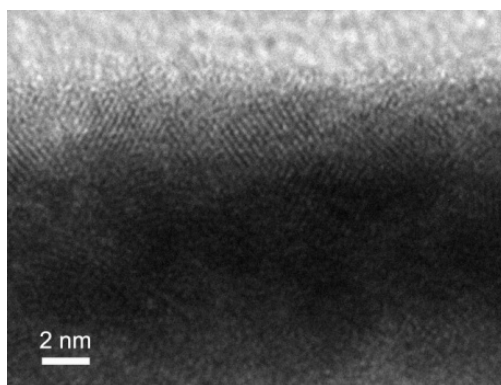

**Fig. S13** HRTEM image of the solid sphere.



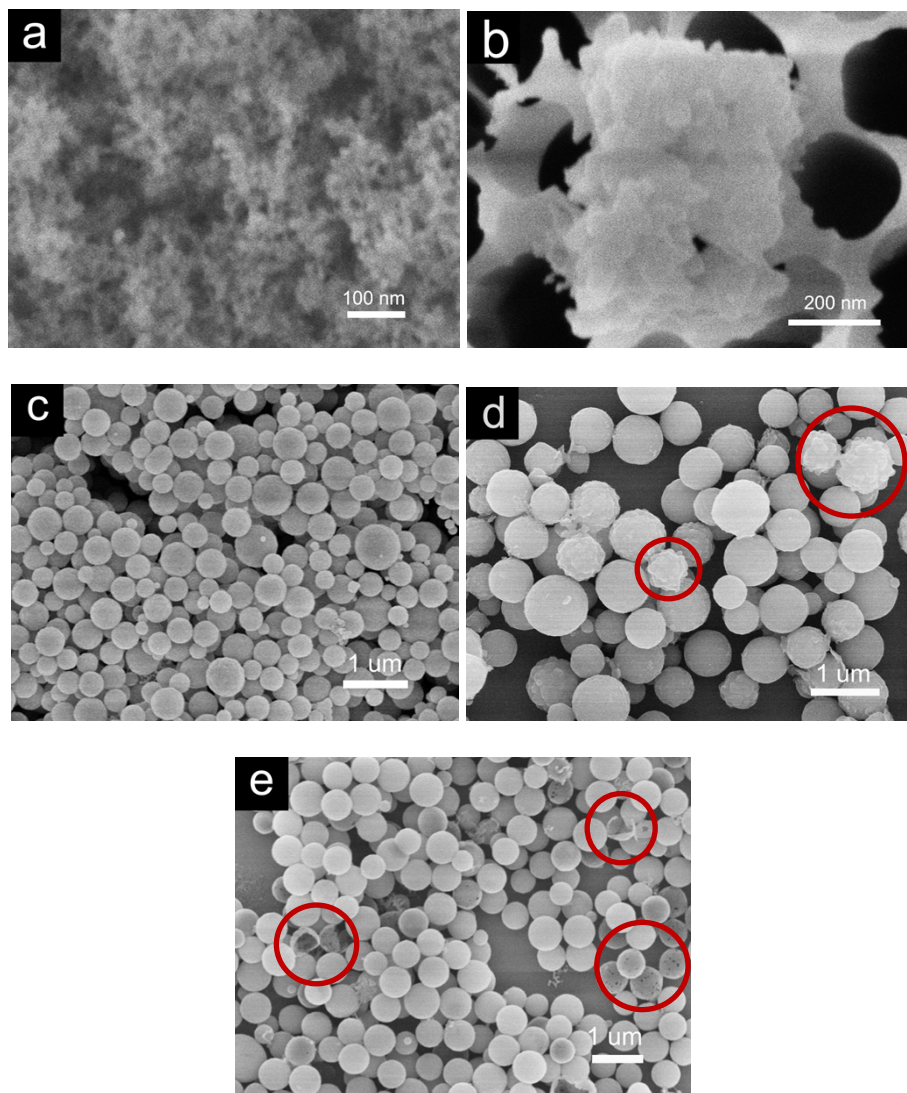

**Fig. S14** FESEM images of the obtained TbBTB nanospheres at different reaction time of (a) 0.5, (b) 1, (c) 4, (d) 12 and (e) 20 h.

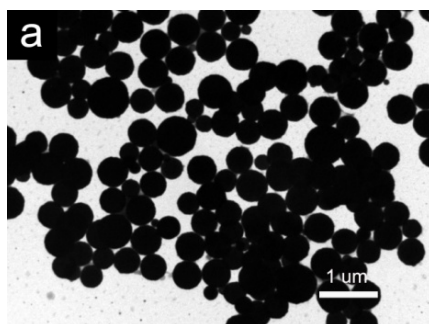

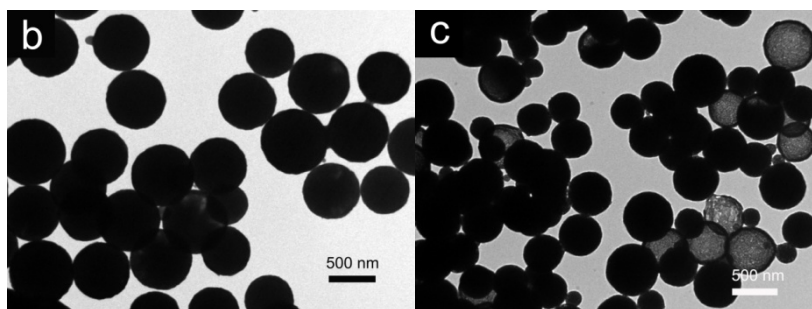

**Fig. S15** TEM images of the obtained TbBTB nanospheres at different reaction time of (a) 4, (b) 12 and (c) 20 h.

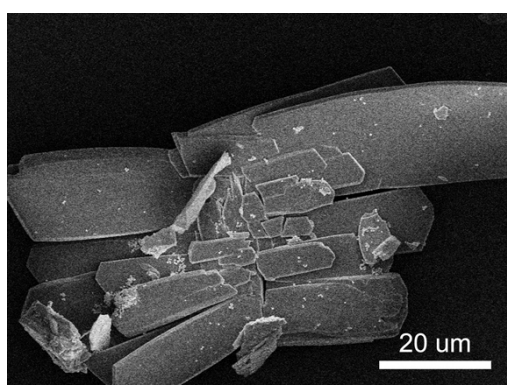

**Fig. S16** FESEM image of the product obtained after 7 days.

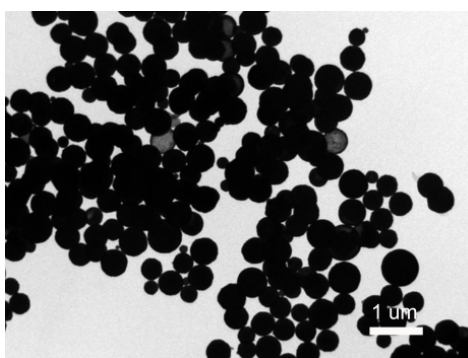

**Fig. S17** TEM image of the product obtained by aging the nanospheres formed at 4h in the solvent without any other reactants at 120 °C for 20h.

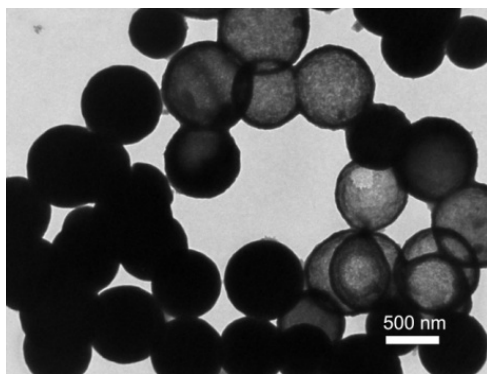

**Fig. S18** TEM image of products prepared for 36h at the same condition as the literature (0.05 mmol H<sub>3</sub>BTB and 0.05 mmol Tb(NO<sub>3</sub>)<sub>3</sub> were dissolved in the mixed solvent of 12.5 mL DMF and H<sub>2</sub>O (v:v= 8 : 4.5), heated at 150 °C for 36 h).<sup>3</sup>

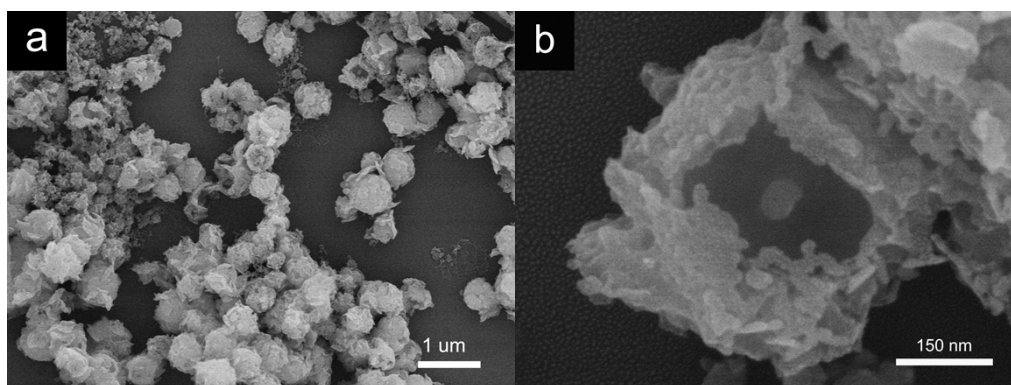

**Fig. S19** (a) Low and (b) high magnification FESEM images of the obtained products at 140 °C in the reaction system employed in the experimental section.

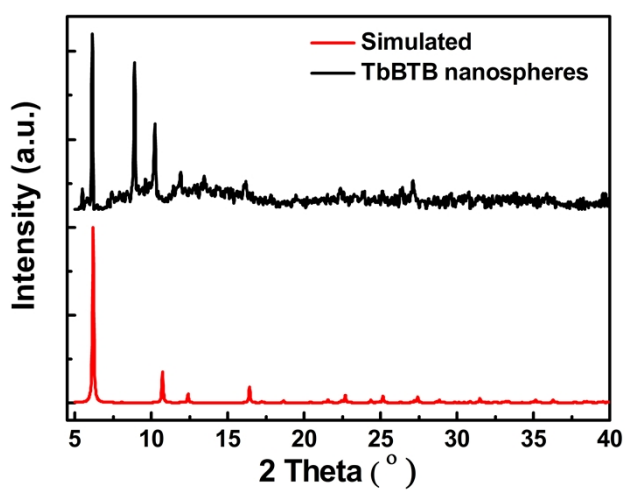

**Fig. S20** X-ray diffraction pattern of (a) TbBTB single crystal (red line) and (b)

TbBTB nanospheres (black line).

## References

1. Devic, T.; Serre, C.; Audebrand, N.; Marrot, J.; Férey, G., MIL-103, a 3-D lanthanide-based metal organic framework with large one-dimensional tunnels and a high surface area. *Journal of the American Chemical Society* 2005, **127**, 12788-12789.
2. Hu, Z.; Deibert, B. J.; Li, J., Luminescent metal–organic frameworks for chemical sensing and explosive detection. *Chemical Society reviews* 2014, **43**, 5815-5840.
3. Zhong, S.-L.; Xu, R.; Zhang, L.-F.; Qu, W.-G.; Gao, G.-Q.; Wu, X.-L.; Xu, A.-W., Terbium-based infinite coordination polymer hollow microspheres: preparation and white-light emission. *Journal of Materials Chemistry* 2011, **21**, 16574-16580.
